# Supplementary material for: Impact of Commercial Inactive Yeast Derivatives on Antiradical Properties, Volatile and Sensorial Profiles of Grašac Wines
Source: MDPI journal article supplement (doi:10.3390/fermentation9050494), 2023-05-22
Supplement: s1 [file s1]

Table S1. Concentration of volatile compounds (mg/L) found in Grašac wines produced with different IYD treatments after 3- and 6-month aging period – with standard deviation and statistical differences

| Compound                   | Aroma                        | OTL,<br>mg/L | Time | C            | YD treatment |             |             |             |             |              |              |             |
|----------------------------|------------------------------|--------------|------|--------------|--------------|-------------|-------------|-------------|-------------|--------------|--------------|-------------|
|                            |                              |              |      |              | NO           |             | OL          |             | OW          |              | OE           |             |
|                            |                              |              |      |              | 20 g/L       | 40 g/L      | 20 g/L      | 40 g/L      | 20 g/L      | 40 g/L       | 20 g/L       | 40 g/L      |
| Alcohols                   |                              |              |      |              |              |             |             |             |             |              |              |             |
| 3-Methyl-1-butanol         | Whisky, alcohol**            | 30.00**      | 3    | 28.32a±0.23  | 24.13b±0.32  | 33.64c±0.58 | 40.48d±0.64 | 37.44c±1.22 | 39.97d±0.86 | 39.74d±0.45  | 37.84c±0.92  | 39.80d±0.81 |
|                            |                              |              | 6    | 23.1a±0.81   | 22.30a±0.51  | 12.59b±0.01 | 13.70c±0.23 | 18.59d±0.34 | 13.85c±0.46 | 29.28c±1.02  | 37.82c±0.92  | 39.82f±0.48 |
| 2-Methyl-1-propanol        | Vinous, solvent-like, bitter | 30.00**      | 3    | 15.68a±0.33  | 6.08b±0.03   | 11.33c±0.12 | 14.20d±0.96 | 8.15e±0.44  | 9.80f±0.76  | 15.00ad±0.43 | 8.99ef±0.83  | 14.95d±0.02 |
|                            |                              |              | 6    | 19.21ab±0.23 | 5.22c±0.02   | 18.55a±0.56 | 19.87b±0.57 | 14.31d±0.23 | 10.28c±0.59 | 18.69ab±0.77 | 8.69f±0.22   | 16.39g±0.73 |
| n-Hexanol                  | Green grass*                 | 8.000*       | 3    | 4.52a±0.34   | 5.51b±0.22   | 5.88bc±0.16 | 6.49d±0.38  | 6.9e±0.168  | 5.16b±0.53  | 6.02cd±0.32  | 5.97±0.45bcd | 4.96a±0.67  |
|                            |                              |              | 6    | 4.10a±0.05   | 5.25bc±0.29  | 5.71c±0.42  | 6.32d±0.44  | 6.11d±0.40  | 4.99b±0.31  | 5.88d±0.38   | 5.11b±0.12   | 4.83b±0.49  |
| Phenyl ethyl alcohol       | Flower, pollen*              | 14.000*      | 3    | 15.21a±0.88  | 14.54a±0.29  | 18.68b±0.43 | 16.26c±0.09 | 22.95d±0.33 | 24.53e±0.92 | 22.35d±0.29  | 13.13f±0.07  | 19.39g±0.24 |
|                            |                              |              | 6    | 15.55a±0.28  | 19.30b±0.39  | 26.26c±0.41 | 22.73d±0.71 | 23.72e±0.49 | 38.94e±0.95 | 35.00f±0.22  | 20.81g±0.64± | 25.10h±0.09 |
| Total alcohols             |                              |              | 3    | 63.73        | 50.26        | 69.53       | 77.43       | 75.52       | 79.46       | 84.11        | 65.93        | 79.1        |
|                            |                              |              | 6    | 61.96        | 52.07        | 63.11       | 62.62       | 62.73       | 68.06       | 88.85        | 70.43        | 86.14       |
| Esters                     |                              |              |      |              |              |             |             |             |             |              |              |             |
| Ethyl acetate              | Fruity, sweet*               | 7.500*       | 3    | 17.98ab±0.73 | 16.73c±0.23  | 28.55d±0.58 | 17.31a±0.22 | 19.67e±0.26 | 18.58b±0.44 | 21.60f±0.65  | 19.81ef±0.93 | 20.73f±0.47 |
|                            |                              |              | 6    | 12.02a±0.02  | 14.25b±0.27  | 18.30c±0.66 | 21.79d±0.36 | 16.59e±0.75 | 19.39f±0.25 | 14.11b±0.48  | 20.63g±0.27  | 16.25c±0.42 |
| Ethyl hexanoate            | Fruity, anis*                | 0.005*       | 3    | 1.11a±0.04   | 1.19ab±0.09  | 1.21b±0.03  | 1.13ab±0.08 | 1.38c±0.01  | 1.70d±0.03  | 1.39c±0.06   | 1.06e±0.00   | 1.23b±0.06  |
|                            |                              |              | 6    | 1.85a±0.02   | 1.52b±0.05   | 3.25c±0.04  | 4.41d±0.08  | 3.45e±0.07  | 1.96f±0.04  | 1.45b±0.07   | 1.34g±0.07   | 1.58b±0.09  |
| Ethyl octanoate            | Pineapple, pear, floral*     | 0.002*       | 3    | 3.21a±0.08   | 4.37b±0.10   | 4.88c±0.07  | 4.65d±0.09  | 4.03e±0.02  | 4.05e±0.09  | 4.71d±0.16   | 4.28b±0.06   | 4.75d±0.12  |
|                            |                              |              | 6    |              | 3.67a±0.21   | 2.86bc±0.17 | 2.57b±0.34  | 3.69a±0.15  | 3.36d±0.06  | 3.01ce±0.15  | 3.19e±0.05   | 3.85a±0.04  |
| Methyl octanoate           | Orange                       | 0.017        |      |              |              | 1.67a±0.03  | 3.06bc±0.16 | 2.86b±0.19  | 2.02d±0.02  | 3.30c±0.14   | 3.80e±0.13   | 3.26c±0.05  |
|                            |                              |              |      |              |              | 1.11a±0.02  | 2.89b±0.09  | 2.53c±0.16  | 1.86d±0.08  | 3.05be±0.15  | 3.68f±0.14   | 3.18e±0.07  |
| Ethyl decanoate            | Fruity, pleasant*            | 0.200*       | 3    | 7.53a±0.28   | 5.66b±0.03   | 6.20c±0.12  | 6.75de±0.14 | 6.56cd±0.20 | 6.97e±0.11  | 6.10c±0.02   | 6.38cd±0.06  | 6.13c±0.09  |
|                            |                              |              | 6    | 6.23a±0.09   | 6.72b±0.15   | 6.02c±0.01  | 6.15ac±0.19 | 6.18ac±0.14 | 7.08d±0.26  | 6.64b±0.03   | 6.96d±0.37   | 6.56b±0.22  |
| Ethyl dodecanoate          | Floral, fruity*              | 1.500*       | 3    | 10.98a±0.87  | 6.03b±0.43   | 5.41c±0.21  | 6.04b±0.20  | 4.08d±0.33  | 6.16be±0.31 | 6.64e±0.27   | 5.11f±0.03   | 4.01d±0.14  |
|                            |                              |              | 6    | 9.88a±0.73   | 4.03b±0.03   | 4.05b±0.13  | 4.86c±0.27  | 3.80d±0.02  | 4.65c±0.13  | 3.42e±0.26   | 3.56e±0.33   | 3.05f±0.03  |
| 3-Methyl-1-butanol-acetate | Fruity, pear                 | 0.030        | 3    | 0.40a±0.00   |              | 0.91b±0.01  | 0.10c±0.00  | 0.10c±0.00  | 0.91b±0.02  | 0.36d±0.00   | 0.40a±0.02   | 0.43a±0.05  |
|                            |                              |              | 6    | 0.31a±0.00   |              | 0.79b±0.04  | 0.15c±0.00  | 0.11d±0.01  | 0.97e±0.03  | 0.78b±0.01   | 0.80b±0.02   | 0.84b±0.05  |

|                              |                                 |         |   |             |            |             |             |              |             |              |             |             |
|------------------------------|---------------------------------|---------|---|-------------|------------|-------------|-------------|--------------|-------------|--------------|-------------|-------------|
| 3-Methyl- butyl - octanoate  | Fruity, pineapple, banana       | 0.125   | 3 | 7.18a±0.06  | 4.44b±0.28 | 5.38c±0.09  | 5.65cd±0.23 | 6.08e±0.18   | 5.82d±0.22  | 5.53cd±0.13  | 5.37c±0.12  | 5.74d±0.15  |
|                              |                                 |         | 6 | 6.98a±0.48  | 5.44b±0.05 | 5.51b±0.17  | 4.81c±0.22  | 5.01bc±0.46  | 6.20d±0.17  | 5.34b±0.13   | 5.57b±0.04  | 5.49b±0.16  |
| 3-methyl- butyl - pentanoate | Fruity, pineapple, mango        |         | 3 | 0.29a±0.02  | 0.14b±0.01 | 0.19c±0.01  | 0.24d±0.01  | 0.22d±0.03   | 0.24d±0.02  | 0.20cd±0.01  | 0.26a±0.01  | 0.20±0.01cd |
|                              |                                 |         | 6 | 0.41a±0.03  | 0.25b±0.01 | 0.31c±0.02  | 0.34c±0.02  | 0.28d±0.01   | 0.38c±0.05  | 0.31cd±0.02  | 0.32c±0.01  | 0.30cd±0.03 |
| Ethyl-(9)- decenoate         | Green, fruity, fatty            | 0.100   | 3 | 3.55a±0.22  | 3.59a±0.06 | 3.75ab±0.26 | 4.18c±0.09  | 4.03bc±0.15  | 4.36c±0.19  | 4.24c±0.03   | 3.95b±0.02  | 4.20c±0.12  |
|                              |                                 |         | 6 | 3.61a±0.03  | 4.27b±0.16 | 4.82c±0.04  | 3.69a±0.17  | 3.84ad±0.23  | 4.02d±0.13  | 3.97d±0.33   | 4.24bd±0.17 | 4.48b±0.25  |
| ethyl 9- hexadecenoate       | Sweet, fruity, waxy             | 2.000   | 3 | 7.4a±0.53   |            |             | 10.11b±0.78 | 16.87c±0.83  | 16.49c±0.26 | 16.74c±0.62  | 12.34d±0.16 | 16.23c±0.44 |
|                              |                                 |         | 6 | 8.23a±0.43  |            |             | 31.88b±0.44 | 33.31cd±0.59 | 27.10e±0.59 | 32.76d±0.77  | 29.52e±0.24 | 33.07c±0.65 |
| 2-phenil-ethyl acetate       | Pleasant, floral, rose, honey*  | 0.250*  | 3 | 10.39a±0.24 | 8.91b±0.14 | 11.84c±0.07 | 10.94d±0.17 | 11.92c±0.44  | 12.69d±0.32 | 11.94c±0.13  | 10.54a±0.44 | 10.4a2±0.27 |
|                              |                                 |         | 6 | 8.22a±0.35  | 7.10b±0.06 | 14.53c±0.35 | 13.81d±0.42 | 14.10cd±0.55 | 15.21e±0.07 | 14.98ce±0.34 | 12.78f±0.06 | 13.11g±0.05 |
| Hexyl acetate                | Pleasant, fruity, pear*         | 0.670*  | 3 | -           | 0.56a±0.02 | 0.16bc±0.01 | 0.15b±0.01  | 0.18c±0.02   | 0.18c±0.00  |              | 0.14b±0.00  | 0.16bc±0.00 |
|                              |                                 |         | 6 | -           | tr         | tr          |             |              |             |              |             |             |
| Total esters                 |                                 |         | 3 | 70.02       | 51.07      | 69.98       | 70.16       | 77.81        | 79.99       | 82.76        | 73.31       | 77.34       |
|                              |                                 |         | 6 | 57.74       | 47.25      | 61.55       | 97.35       | 92.88        | 92.16       | 89.83        | 92.59       | 91.76       |
| Acids                        |                                 |         |   |             |            |             |             |              |             |              |             |             |
| Octanoic acid                | Unpleasant, cheese, fatty acid* | 0.500*  | 3 | 2.13a±0.03  | 0.98b±0.01 | 2.23ac±0.12 | 2.81d±0.05  | 2.78d±0.17   | 3.55e±0.07  | 3.08f±0.01   | 2.09a±0.02  | 2.31c±0.03  |
|                              |                                 |         | 6 | 2.23a±0.02  | 3.29b±0.09 | 5.27c±0.28  | 4.71d±0.18  | 4.19e±0.33   | 4.55e±0.13  | 4.21e±0.56   | 4.13e±0.34  | 2.61f±0.02  |
| Decanoic acid                | Fatty, unpleasant*              | 15.000* | 3 | 1.47a±0.03  | 0.49b±0.02 | 1.18c±0.03  | 1.70d±0.05  | 1.67d±0.06   | 2.31e±0.01  | 2.01f±0.04   | 1.67d±0.08  | 1.36g±0.01  |
|                              |                                 |         | 6 | 1.98a±0.02  | 2.29b±0.09 | 3.84c±0.26  | 3.82c±0.13  | 3.02d±0.24   | 3.02d±0.09  | 3.32e±0.04   | 3.12d±0.06  | 1.78f±0.02  |
| Dodecanoic acid              | Soapy, waxy                     | 10.000  | 3 | 10.13a±0.57 | -          | -           | 9.07b±0.26  | 10.40a±0.32  | 13.44c±0.14 | 12.06d±0.55  | 9.52e±0.14  | 7.72f±0.03  |
|                              |                                 |         | 6 | 10.99a±0.36 |            |             | 13.97b±0.57 | 16.99c±0.75  | 19.07d±0.77 | 15.05e±0.26  | 12.80f±0.07 | 11.84g±0.43 |
| Total acids                  |                                 |         | 3 | 13.73       | 1.47       | 3.41        | 13.58       | 14.85        | 19.3        | 17.15        | 13.28       | 11.39       |
|                              |                                 |         | 6 | 15.2        | 5.59       | 9.12        | 22.50       | 24.20        | 26.64       | 22.58        | 20.05       | 16.23       |

\*IYD treatments: NO20 Nobless™ 20 g/L, NO40: Nobless™ 40 g/L, OL20: Opty Less™ 20 g/L, OL40: Opty Less™ 40 g/L, OW20: Optimum White™ 20 g/L, OW40: Optimum White™ 40 g/L, OE20: Oennolees™ 20 g/L, OE40: Oennolees™ 40 g/L;

\*\*The values in the table represent the mean value of three replications.

\*\*\*tr- trace;

\*\*\*\*Different letters indicate statistically significant differences in the same column (p < 0.05).
